# Supplementary material
Source: MDPI journal article supplement (https://www.mdpi.com/1424-8247/16/9/1319)
Supplement: s1 [file s1]

## Supplementary Material

# Evaluating known Zika virus NS2B-NS3 protease inhibitor scaffolds by in silico screening and biochemical assays

Lucianna H. Santos <sup>1,†</sup>, Rafael E. O. Rocha <sup>1</sup>, Diego L. Dias <sup>2</sup>, Beatriz M. R. M. Ribeiro <sup>1</sup>, Mateus Sá M. Serafim <sup>2</sup>, Jônatas S. Abrahão <sup>2</sup> and Rafaela S. Ferreira <sup>1,\*</sup>

<sup>1</sup> Departamento de Bioquímica e Imunologia, Instituto de Ciências Biológicas, Universidade Federal de Minas Gerais (UFMG), Belo Horizonte, 31270-901, MG, Brazil.

<sup>2</sup> Departamento de Microbiologia, Instituto de Ciências Biológicas, Universidade Federal de Minas Gerais (UFMG), Belo Horizonte, 31270-901, MG, Brazil.

† Current address: Institut Pasteur de Montevideo, Mataojo 2020, 11400, Montevideo, Uruguay.

\* Correspondence: rafaelasf@icb.ufmg.br

**Table S1.** Number of compounds found on ZINC15 that have any similarity with Lee et al. (2017) inhibitors.

| Query                    | ZINC IDs         | N° of compounds* |
|--------------------------|------------------|------------------|
| Scaffold                 | **               | 102              |
| LEE-1                    | ZINC000009325712 | 41               |
| LEE-2                    | ZINC000020570103 | 158              |
| LEE-3                    | ZINC000009325709 | 68               |
| LEE-4                    | ZINC000009354775 | 158              |
| LEE-5                    | ZINC000009354778 | 44               |
| LEE-6                    | ZINC000009404221 | 8                |
| LEE-7                    | ZINC000009404670 | 9                |
| LEE-8                    | ZINC000009325713 | 27               |
| LEE-9                    | None found       | 3                |
| LEE-10                   | None found       | 0                |
| Total                    | -                | 615              |
| Without<br>duplicates*** | -                | 509              |

\* The compounds were queried using the 2019 version of ZINC 15, employing the Substructure and Tanimoto similarity options. \*\* The scaffold identified for LEE-1, LEE-2, LEE-3, LEE-4, and LEE-8 was FTFINDUAXQKBQP-UHFFFAOYSA-N. For LEE-5, the scaffold identified was QRBWCVPETSVZCW-UHFFFAOYSA-N. LEE-6 had the scaffold ZCVZIZAPLBGIBR-UHFFFAOYSA-N, while LEE-7 had the scaffold HSGVUNDOGWMDOE-UHFFFAOYSA-N. \*\*\* Individual searches identified duplicates. We removed these duplications.

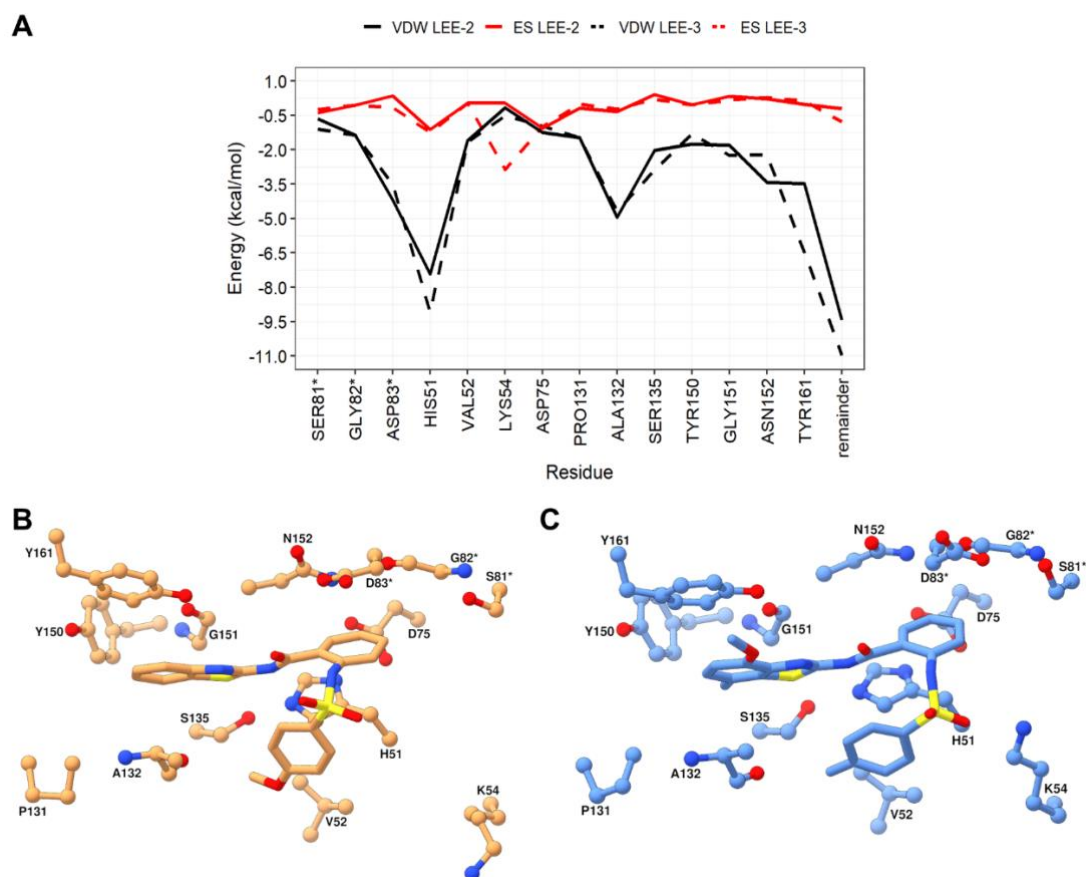

**Figure S1.** Interaction signature and putative binding modes of LEE-2 and LEE-3. (A) Per-residue van der Waals (VDW, black lines) and electrostatic (ES, red lines) interaction energies (kcal/mol) of the reference compounds LEE-2 (solid lines) and LEE-3 (dashed lines). Interaction energies are almost superimposed due to the similar binding modes. Binding modes of LEE-2 (B) and LEE-3 (C) from Santos et al. (2022).

**Table S2.** Zinc ID, ID, score, and hydrogen bond (hbond) count for the selected 36 compounds.

| ZINC ID          | ID | MULTIGRID<br>SCORE | HBOND<br>(ALL) | HBOND<br>LIGAND<br>ATOMS | HBOND<br>PROTEASE<br>ATOMS |
|------------------|----|--------------------|----------------|--------------------------|----------------------------|
| ZINC001638119710 |    | -47.70             | 1              | 1                        | 1                          |
| ZINC001627271434 |    | -46.49             | 1              | 1                        | 1                          |
| ZINC001611309804 | 5  | -46.34             | 1              | 1                        | 1                          |
| ZINC001294554668 |    | -45.46             | 1              | 1                        | 1                          |
| ZINC000254402523 |    | -44.67             | 1              | 1                        | 1                          |
| ZINC001540153846 |    | -42.98             | 1              | 1                        | 1                          |
| ZINC001471637015 | 12 | -42.77             | 1              | 1                        | 1                          |
| ZINC000254523810 | 9  | -42.68             | 1              | 1                        | 1                          |
| ZINC000254820807 |    | -42.59             | 2              | 2                        | 2                          |
| ZINC000760952832 | 4  | -42.28             | 1              | 1                        | 1                          |
| ZINC000006147289 |    | -42.08             | 2              | 2                        | 2                          |
| ZINC000426623750 | 1  | -42.01             | 1              | 1                        | 1                          |
| ZINC000254744176 |    | -41.58             | 1              | 1                        | 1                          |
| ZINC001469953631 |    | -41.57             | 1              | 1                        | 1                          |
| ZINC000254555735 | 11 | -41.47             | 1              | 1                        | 1                          |
| ZINC001650929045 |    | -41.07             | 1              | 1                        | 1                          |
| ZINC000510134491 | 7  | -40.80             | 1              | 1                        | 1                          |
| ZINC001301832358 |    | -40.77             | 1              | 1                        | 1                          |
| ZINC000760949985 | 3  | -40.73             | 1              | 1                        | 1                          |
| ZINC000506553351 |    | -40.63             | 1              | 1                        | 1                          |
| ZINC001631305868 |    | -40.20             | 1              | 1                        | 1                          |
| ZINC000100873004 | 10 | -40.15             | 2              | 2                        | 2                          |
| ZINC000487872991 |    | -39.89             | 1              | 1                        | 1                          |
| ZINC001545875234 |    | -39.85             | 1              | 1                        | 1                          |
| ZINC001639199761 |    | -39.77             | 1              | 1                        | 1                          |
| ZINC000479639818 | 2  | -39.35             | 1              | 1                        | 1                          |
| ZINC000511552346 |    | -39.22             | 1              | 1                        | 1                          |
| ZINC000009471842 |    | -39.15             | 1              | 1                        | 1                          |
| ZINC000006146757 |    | -39.13             | 1              | 1                        | 1                          |
| ZINC001635657618 |    | -38.63             | 1              | 1                        | 1                          |
| ZINC000020569683 |    | -38.40             | 1              | 1                        | 1                          |
| ZINC000519475921 | 8  | -38.33             | 1              | 1                        | 1                          |
| ZINC001135702587 | 6  | -37.42             | 1              | 1                        | 1                          |
| ZINC001637550049 | 13 | -36.71             | 1              | 1                        | 1                          |
| ZINC000427717744 |    | -35.93             | 1              | 1                        | 1                          |
| ZINC000507148232 |    | -34.95             | 1              | 1                        | 1                          |

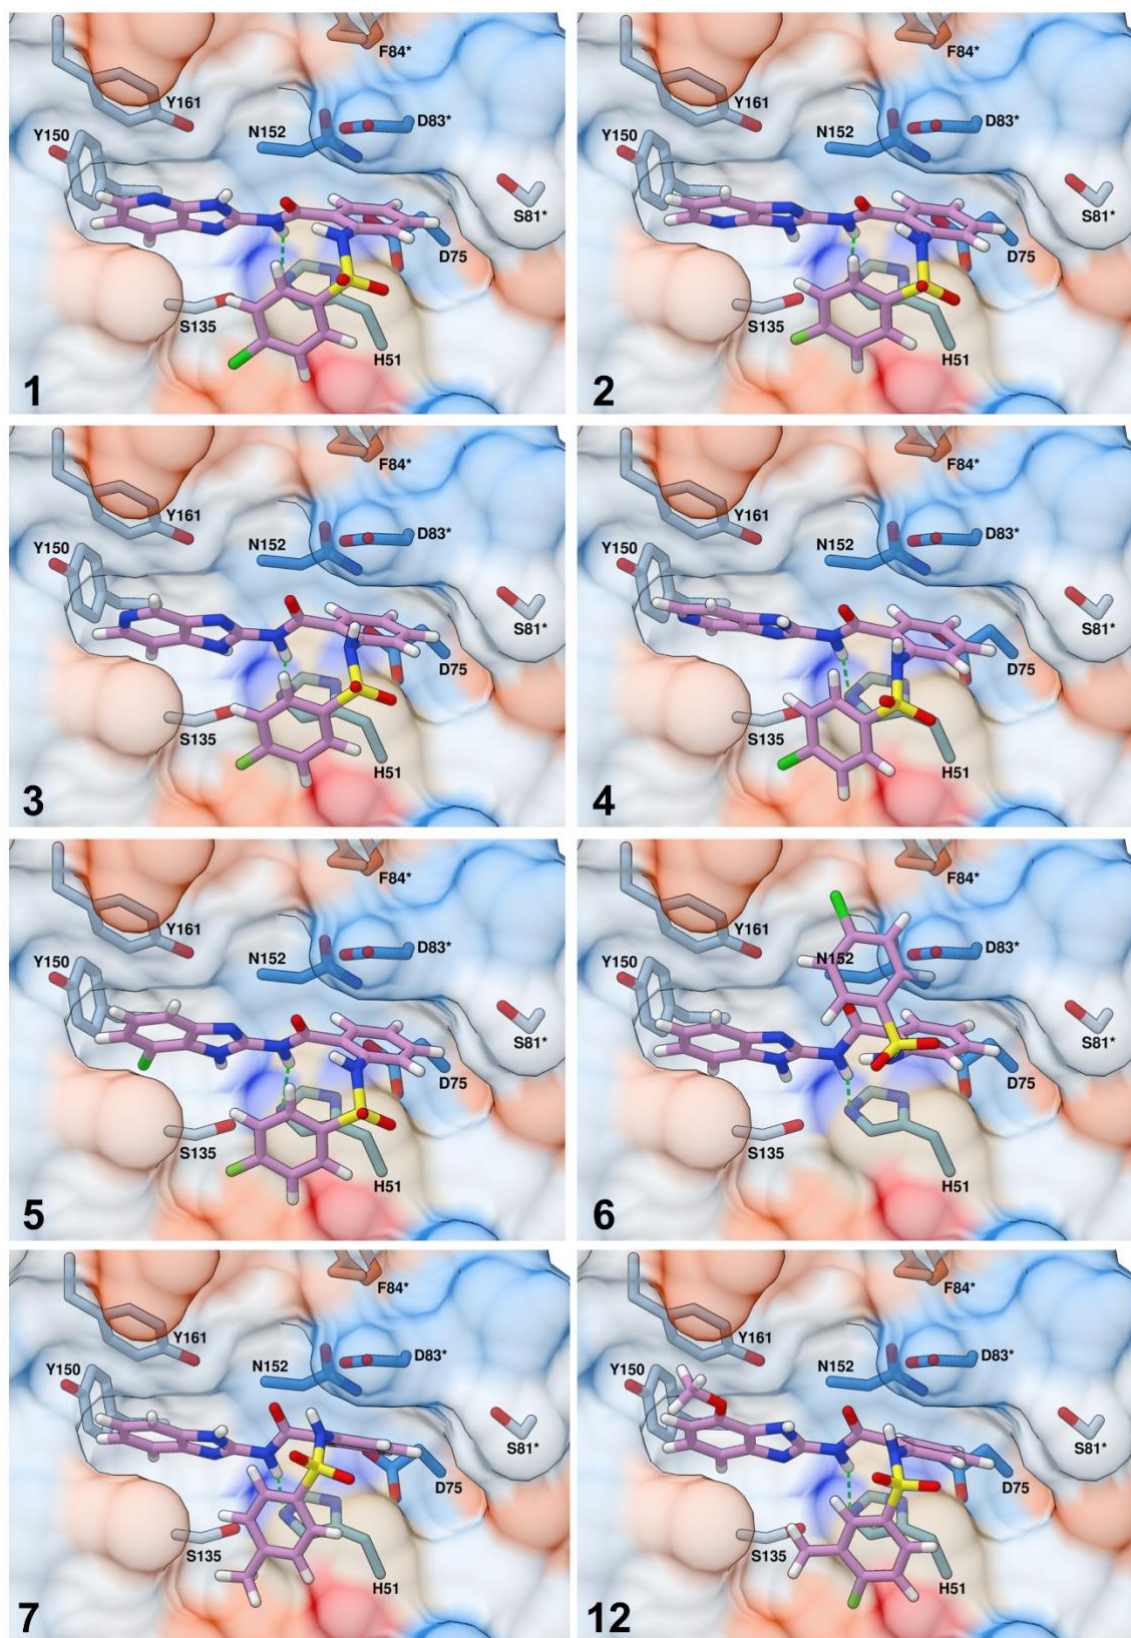

**Figure S2.** Binding modes of chosen compounds 1, 2, 3, 4, 5, 6, 7, and 12 from molecular docking. Surface and NS2B-NS3pro residues are colored by hydrophobicity. Colored areas range from dodger blue for the most hydrophilic, to orange red for the most hydrophobic.



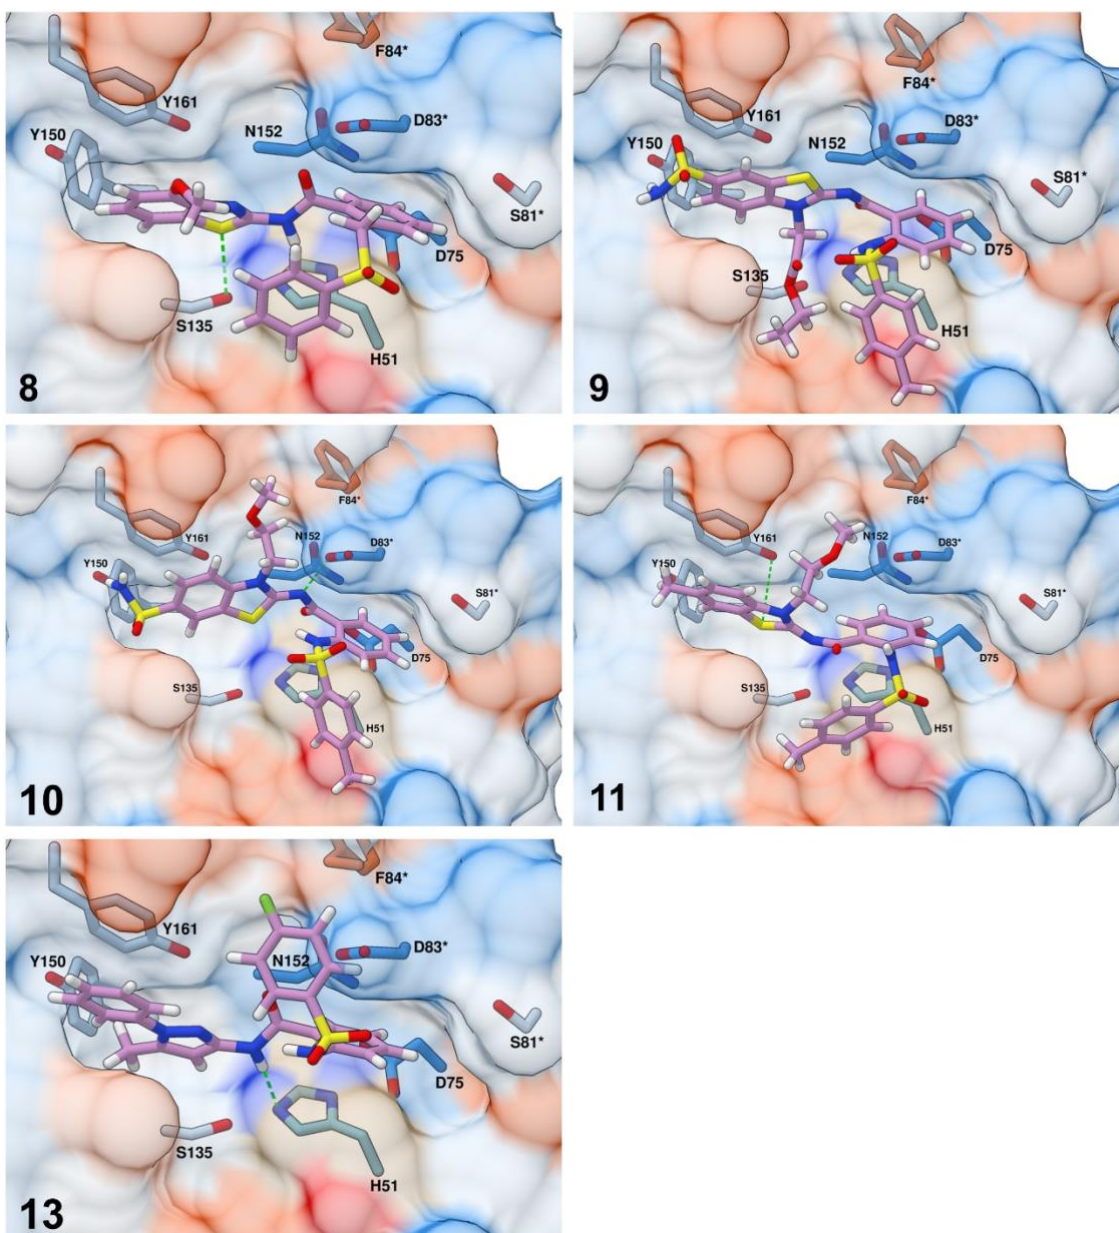

**Figure S3.** Binding modes of chosen compounds 8, 9, 10, 11, and 13 from molecular docking. Surface and NS2B-NS3pro residues are colored by hydrophobicity. Colored areas range from dodger blue for the most hydrophilic, to orange red for the most hydrophobic.

**Table S3.** Hill coefficient retrieved from dose-response curves for the most potent ZIKV inhibitors.

| ID | Hill Slope |           |
|----|------------|-----------|
|    | Replica 1  | Replica 2 |
| 1  | 3.046      | 1.585     |
| 2  | 0.731      | 4.089     |
| 4  | 0.8047     | 0.5347    |
| 5  | 3.333      | 1.731     |
| 6  | 6.697      | 4.362     |
| 7  | 2.014      | 1.056     |
| 12 | 1.517      | 1.742     |
| 13 | 5.057      | 5.334     |

## References

- Lee, H., Ren, J., Nocadello, S., Rice, A. J., Ojeda, I., Light, S., Minasov, G., Vargas, J., Nagarathnam, D., Anderson, W. F., & Johnson, M. E. (2017). Identification of novel small molecule inhibitors against NS2B/NS3 serine protease from Zika virus. *Antiviral Research*, 139, 49–58. <https://doi.org/10.1016/j.antiviral.2016.12.016>
- Santos, L. H., Caffarena, E. R., & Ferreira, R. S. (2022). pH and non-covalent ligand binding modulate Zika virus NS2B/NS3 protease binding site residues: Discoveries from MD and constant pH MD simulations. *Journal of Biomolecular Structure and Dynamics*, 40(20), 10359–10372. <https://doi.org/10.1080/07391102.2021.1943528>
